# Supplementary material
Source: PubMed Central journal article supplement (PMC2804183)
Supplement: supp_M109.003491_supplementary18Nov.pdf [file supp_M109.003491_supplementary18Nov.pdf]

# Supplementary figure 1

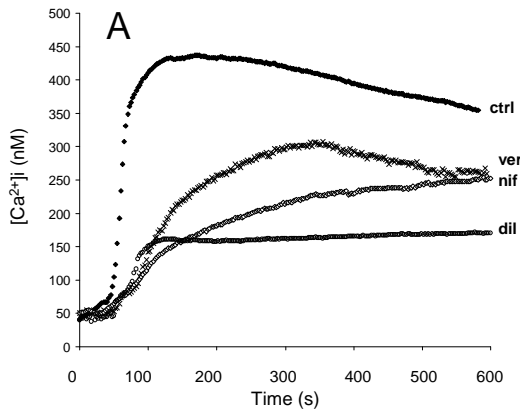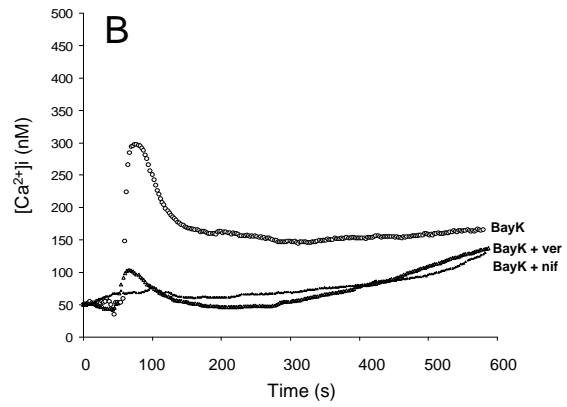

## Supplementary figure 2

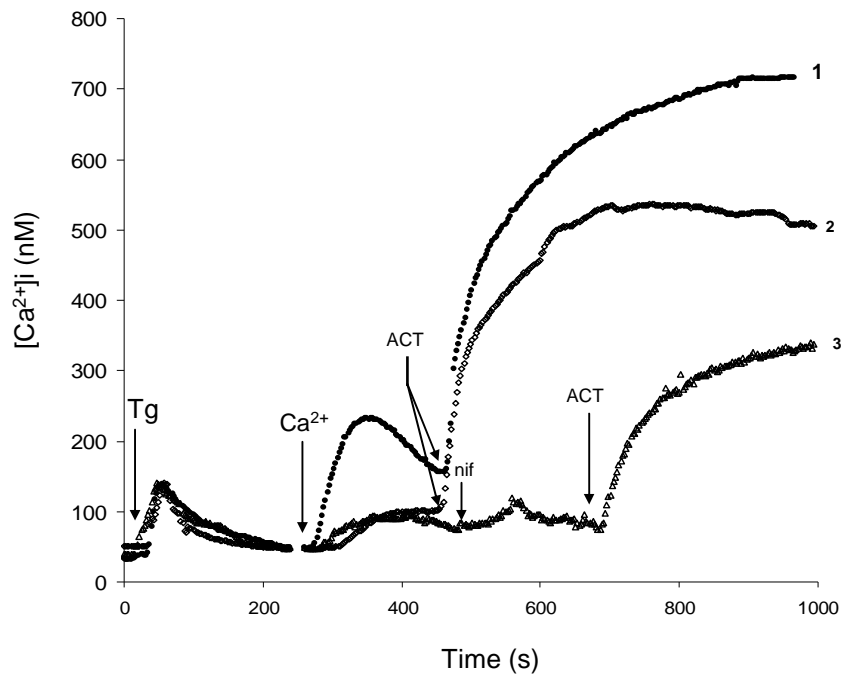

# Supplementary figure 3

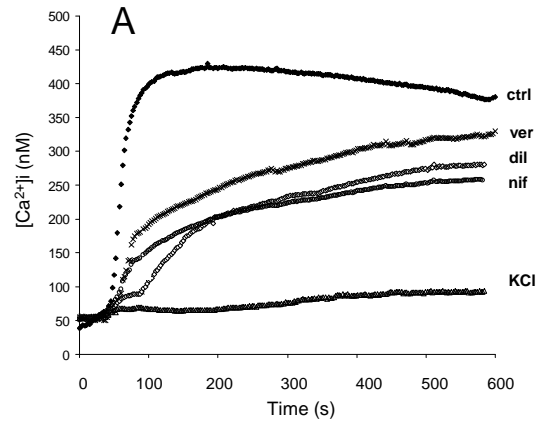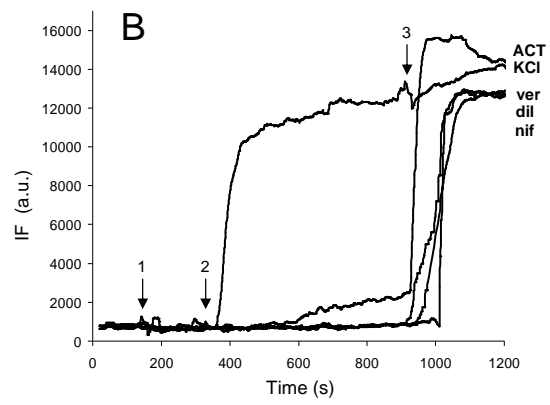

# Supplementary figure 4

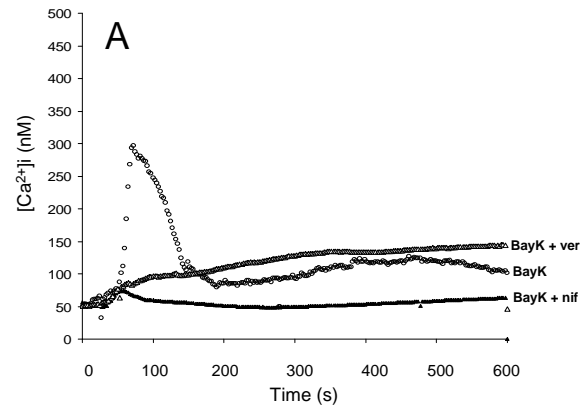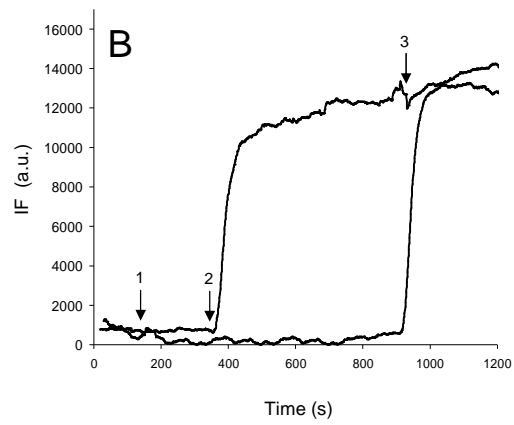

## Supplementary figure legends

Fig. S1. Effect of L-type calcium channels antagonists on the ACT-induced intracellular calcium increase in J774A.1 macrophages (A) and, on the calcium increase induced by Bay K 8644, an agonist of L-type calcium channels (B). Concentrations of ACT, nifedipine, verapamil, diltiazem and Bay K 8644 used were, 35 nM, 10  $\mu$ M, 100  $\mu$ M, 0.5 mM and 100 mM, respectively.

Fig. S2. Inhibition of capacitative  $\text{Ca}^{2+}$  entry does not affect the ACT-induced intracellular calcium increase. In cells incubated in  $\text{Ca}^{2+}$  free medium, depletion of intracellular stores with 0.2 mM thapsigargin and subsequent addition of 2.4 mM  $\text{Ca}^{2+}$  stimulates capacitative  $\text{Ca}^{2+}$  entry. Addition of ACT in these conditions induces an additional  $\text{Ca}^{2+}$  increase (curve 1); inhibition of capacitative  $\text{Ca}^{2+}$  entry by preincubation of cells with 100 mM 2-APB does not affect the ACT-induced  $\text{Ca}^{2+}$  rise (curve 2) and, under conditions that capacitative  $\text{Ca}^{2+}$  entry is blocked, addition of nifedipine (10  $\mu$ M) reduces significantly the ACT-induced  $\text{Ca}^{2+}$  rise (curve 3).

Fig. S3. Effect of L-type calcium channels antagonists (nifedipine, verapamil and diltiazem) on the ACT-induced intracellular calcium increase in cells depolarized with 50 mM KCl (A); the addition of the antagonists or ACT did not modified the plasma membrane potential measured with the fluorescent probe bis-oxonol (B), arrow (1) corresponds to the addition of 35nM ACT, 10  $\mu$ M nifedipine, 100  $\mu$ M verapamil or 0.5 mM diltiazem, arrow (2) corresponds to the addition 50 mM KCl and arrow (3) shows the complete depolarization of the plasma membrane by 1  $\mu$ M gramicidin A.

Fig. S4. Effect of L-type calcium channels antagonists on the Bay K 8644-induced intracellular calcium increase in cells depolarized with 50 mM KCl (A); plasma membrane potential measured with the fluorescent probe bis-oxonol was not modified by the addition of Bay K 8644 (B), arrows 1 and 2 correspond to the addition of 100 nM Bay K 8644, 50 mM KCl, respectively, and arrow 3 corresponds to the addition of 1  $\mu$ M gramicidin A to induce complete depolarization of the plasma membrane.
